# Supplementary material for: Analysis of single-cell RNA sequencing data based on autoencoders
Source: PubMed Central journal article supplement (PMC8186186; doi:10.1186/s12859-021-04150-3), 2021-06-08
Supplement: 12859_2021_4150_MOESM1_ESM.pdf [file 12859_2021_4150_MOESM1_ESM.pdf]

# Analysis of single-cell RNA sequencing data based on autoencoders

Andrea Tangherloni, Federico Ricciuti, Daniela Besozzi,  
Pietro Liò, Ana Cvejic

## Mathematical formulation of the proposed autoencoders

In what follows, we use the notation proposed in [1] to derive the extension of the Mean Maximum Discrepancy Autoencoder (MMDAE) and Mean Maximum Discrepancy Variational Autoencoder (MMDVAE) [1] with multiple Gaussian distributions.

$p^*(\mathbf{x})$  is the unknown probability in the input space over which the optimisation problem is formulated. A similarity measure  $\mathcal{L}$  between the input and the output of the autoencoders (AEs) with respect to the distribution  $p^*(\mathbf{x})$  is maximised:

$$\arg \max_{\phi, \theta} \mathbb{E}[\mathcal{L}(\mathbf{x}, d_{\theta}(e_{\phi}(\mathbf{x})))],$$

where  $\phi$  and  $\theta$  are the weights of the encoder and decoder networks, respectively;  $e_{\phi} : \mathbf{x} \mapsto \mathbf{z}$  and  $d_{\theta} : \mathbf{z} \mapsto \mathbf{x}$ , where  $\mathbf{z}$  is the latent representation of  $\mathbf{x}$  and  $|\mathbf{z}| \leq |\mathbf{x}|$ .

In variational AEs, the input  $\mathbf{x}$  is mapped into a probability distribution over the latent space.  $e(\mathbf{z}|\mathbf{x})$  defines a distribution over the latent space that depends on the input  $\mathbf{x}$  drawn from  $p^*(\mathbf{x})$ . Altogether,  $p^*(\mathbf{x})$  and  $e(\mathbf{z}|\mathbf{x})$  define the joint distribution  $p_e(\mathbf{x}, \mathbf{z}) = e(\mathbf{z}|\mathbf{x})p^*(\mathbf{x})$ , whose marginal and conditional distributions are defined as:

$$p_e(\mathbf{z}) = \int p_e(\mathbf{x}, \mathbf{z}) d\mathbf{x} = \int p_e(\mathbf{z}|\mathbf{x})p^*(\mathbf{x}) d\mathbf{x}$$
$$p_e(\mathbf{x}|\mathbf{z}) = \frac{p_e(\mathbf{x}, \mathbf{z})}{p_e(\mathbf{z})}.$$

Since the representation  $\mathbf{z}$  of  $\mathbf{x}$  should maintain as much as possible the “amount of information” held in  $\mathbf{x}$ , the mutual information  $I(\mathbf{x}; \mathbf{z})$  can be used to measure the representation  $\mathbf{z}$  of  $\mathbf{x}$ . Specifically, for any distribution  $q(\mathbf{z})$  in the latent space, the mutual information between  $p_e(\mathbf{z})$  and  $p^*(\mathbf{x})$  can be bounded below as:

$$I(\mathbf{x}; \mathbf{z}) = \text{KL}(p_e(\mathbf{x}, \mathbf{z})||p^*(\mathbf{x})p_e(\mathbf{z})) \leq \mathbb{E}[\text{KL}(e(\mathbf{z}|\mathbf{x})||q(\mathbf{z}))],$$

where  $\text{KL}(\cdot)$  is the Kullback–Leibler divergence [2] between two distributions.  $I(\mathbf{x}; \mathbf{z})$  can be also bounded above, for any conditional distribution  $d(\mathbf{x}|\mathbf{z})$ , as:

$$I(\mathbf{x}; \mathbf{z}) = \text{KL}(p_e(\mathbf{x}, \mathbf{z})||p^*(\mathbf{x})p_e(\mathbf{z})) \geq \mathbb{E} \left[ \log \left( \frac{d(\mathbf{x}|\mathbf{z})}{p^*(\mathbf{x})} \right) \right].$$

Combining the provided definitions, we obtain that:

$$\mathbb{E} \left[ \log \left( \frac{d(\mathbf{x}|\mathbf{z})}{p^*(\mathbf{x})} \right) \right] \leq I(\mathbf{x}; \mathbf{z}) \leq \mathbb{E}[\text{KL}(e(\mathbf{z}|\mathbf{x})||q(\mathbf{z}))].$$

The lower bound can be further decomposed by means of algebraic manipulations as

$$\mathbb{E} \left[ \log \left( \frac{d(\mathbf{x}|\mathbf{z})}{p^*(\mathbf{x})} \right) \right] = \mathbb{E}[\log(d(\mathbf{x}|\mathbf{z})) + H(p^*(\mathbf{x}))],$$

where  $H(p^*(\mathbf{x}))$  is the entropy of  $p^*(\mathbf{x})$ . By following the definition provided in [1], the ELBO term, which is the measure maximised during the training of VAE, can be written as:

$$\text{ELBO} = -\text{KL}(p_e(\mathbf{z})||q(\mathbf{z})) - H(p^*(\mathbf{x})) - \mathbb{E}[\text{KL}(p_e(\mathbf{x}|\mathbf{z})||d(\mathbf{x}|\mathbf{z}))].$$

In MMDVAE [1],  $\text{KL}(p_e(\mathbf{z})||q(\mathbf{z}))$  is multiplied by a positive factor  $\lambda$  and  $I(\mathbf{x}; \mathbf{z})$ , weighted by a positive factor  $\alpha$ , is added to the ELBO term, obtaining:

$$\begin{aligned} \text{ELBO} &= -\lambda \text{KL}(p_e(\mathbf{z})||q(\mathbf{z})) \\ &\quad - H(p^*(\mathbf{x})) \\ &\quad - \mathbb{E}[\text{KL}(p_e(\mathbf{x}|\mathbf{z})||d(\mathbf{x}|\mathbf{z}))] \\ &\quad + \alpha I(\mathbf{x}; \mathbf{z}). \end{aligned}$$

By applying algebraic manipulations, the ELBO term of MMDVAE can be written as:

$$\begin{aligned} \text{ELBO} &= \mathbb{E}[\log(d(\mathbf{x}|\mathbf{z}))] \\ &\quad - (\alpha + \lambda - 1)\text{KL}(p_e(\mathbf{z})||q(\mathbf{z})) \\ &\quad - (1 - \alpha)\mathbb{E}[\text{KL}(p_e(\mathbf{z}|\mathbf{x})||q(\mathbf{z}))]. \end{aligned} \tag{1}$$

In MMDVAE, the term  $\text{KL}(p_e(\mathbf{z})||q(\mathbf{z}))$  is replaced with  $\text{DSD}(p_e(\mathbf{z})||q(\mathbf{z}))$ , where  $\text{DSD}(\cdot)$  is a general strict divergence function.  $\text{DSD}(p_e(\mathbf{z})||q(\mathbf{z})) = 0$  if and only if  $p_e(\cdot) = q(\cdot)$ . Notice that, the KL is a strict divergence function. MMDVAE exploits the Maximum Mean Discrepancy  $\text{MMD}(\cdot)$  divergence function [3]. A kernel trick is used to define the following divergence function between two distributions  $p_e(\mathbf{z})$  and  $q(\mathbf{z})$ :

$$\begin{aligned} \text{MMD}(p_e(\mathbf{z})||q(\mathbf{z})) &= \mathbb{E}_{p_e(\mathbf{z}), p(\mathbf{z}')}[\mathcal{K}(\mathbf{z}, \mathbf{z}')] \\ &\quad + \mathbb{E}_{q(\mathbf{z}), q(\mathbf{z}')}[\mathcal{K}(\mathbf{z}, \mathbf{z}')] \\ &\quad - 2\mathbb{E}_{p_e(\mathbf{z}), q(\mathbf{z}')}[\mathcal{K}(\mathbf{z}, \mathbf{z}')], \end{aligned}$$

where  $\mathcal{K}(\mathbf{z}, \mathbf{z}')$  can be any desired universal kernel. Here, we considered the Gaussian kernel

$$\mathcal{K}(\mathbf{z}, \mathbf{z}') = e^{-\frac{\|\mathbf{z}-\mathbf{z}'\|^2}{2\sigma^2}}.$$

We extended the ELBO term shown in Eq. 1 such that multiple Gaussian distributions can be used in the latent representation  $\mathbf{z}$ . In addition, we introduced a learnable mixture distribution for  $q(\mathbf{z})$ , whereas  $p_e(\mathbf{z}|\mathbf{x})$  is defined to be a learnable mixture distribution with the same number of components.

In GMVAE [4], the encoder function outputs the following two conditional distributions  $e(\mathbf{z}, y|\mathbf{x})$  and  $e(\mathbf{z}|\mathbf{x}, y)$ , where  $y \in \{1, \dots, K\}$  is a categorical random variable and  $K$  corresponds to the number of desired Gaussian distributions. We obtain that

$$\begin{aligned} p_e(\mathbf{z}, y|\mathbf{x}) &= \frac{p_e(\mathbf{z}, y, \mathbf{x})}{p^*(\mathbf{x})} \\ &= e(\mathbf{z}|y, \mathbf{x})e(y|\mathbf{x}). \end{aligned}$$

Since  $p_e(\mathbf{z}, y|\mathbf{x})$  is fully determined by the output distributions of the encoder, we can refer to  $p_e(\mathbf{z}, y|\mathbf{x})$  with  $e(\mathbf{z}, y|\mathbf{x})$ .

Modelling  $e(y|\mathbf{x})$  as a categorical distribution that can assume values in  $\{1, \dots, K\}$ , and  $e(\mathbf{z}|\mathbf{x}, y)$  as a diagonal Gaussian distribution for each possible value assumed by  $y$ , the marginal conditional distribution  $p_e(\mathbf{z}|\mathbf{x})$  is a Gaussian mixture distribution of  $K$  components, namely:

$$p_e(\mathbf{z}|\mathbf{x}) = \sum_{y=1}^K e(\mathbf{z}|y, \mathbf{x})e(y|\mathbf{x}).$$

Similarly,  $q(\mathbf{z})$  is modelled as a Gaussian mixture distribution by using another variable  $y \in \{1, \dots, K\}$ , with a categorical distribution  $q(y)$ , and considering the conditional distribution  $q(\mathbf{z}|y)$  as a diagonal Gaussian distribution for each possible value of  $y$ . The ELBO term of GMVAE is:

$$ELBO = \mathbb{E} \left[ \mathbb{E} \left[ d(\mathbf{x}|y, \mathbf{z}) - \log \left( \frac{e(\mathbf{z}, y|\mathbf{x})}{q(\mathbf{z}, y)} \right) \right] \right],$$

and it can be rewritten by using the notation proposed in [1] and by algebraic manipulations as:

$$\begin{aligned} ELBO &= -\text{KL}(p_e(\mathbf{z}, y)||q(\mathbf{z}, y)) \\ &= -\mathbb{E}[\text{KL}(p_e(\mathbf{x}|\mathbf{z}, y)||d(\mathbf{x}|\mathbf{z}, y))] \\ &= -H(p^*(\mathbf{x})). \end{aligned}$$

Starting from this definition, we can add the mutual information  $I(\mathbf{x}; (y, \mathbf{z}))$  term, weighted by a positive scalar factor  $\alpha$ , and  $\text{KL}(p_e(\mathbf{z}, y)||q(\mathbf{z}, y))$  is weighted by a positive factor  $\lambda$ , obtaining:

$$\begin{aligned} ELBO &= -\lambda \text{KL}(p_e(\mathbf{z}, y)||q(\mathbf{z}, y)) \\ &\quad - H(p^*(\mathbf{x})) \\ &\quad - \mathbb{E}[\text{KL}(p_e(\mathbf{x}|\mathbf{z}, y)||d(\mathbf{x}|\mathbf{z}, y))] \\ &\quad + \alpha I(\mathbf{x}; (y, \mathbf{z})), \end{aligned}$$

where

$$I(\mathbf{x}; (y, \mathbf{z})) = \mathbb{E} \left[ \log \frac{p_e(\mathbf{x}, y, \mathbf{z})}{p^*(\mathbf{x})p_e(\mathbf{z}, y)} \right].$$

By applying algebraic manipulations, we can rewrite the ELBO term as:

$$\begin{aligned} ELBO &= \mathbb{E}[\log(d(\mathbf{x}|\mathbf{z}, y))] \\ &\quad - (\alpha + \lambda - 1)\text{KL}(p_e(\mathbf{z}, y)||q(\mathbf{z}, y)) \\ &\quad - (1 - \alpha)\mathbb{E}[\text{KL}(p_e(\mathbf{z}, y|\mathbf{x})||q(\mathbf{z}, y))]. \end{aligned}$$

$\text{KL}(p_e(\mathbf{z}, y)||q(\mathbf{z}, y))$  can be further decomposed as:

$$\text{KL}(p_e(\mathbf{z}, y)||q(\mathbf{z}, y)) = \mathbb{E}[\text{KL}(p_e(y|\mathbf{z})||q(y|\mathbf{z}))] + \text{KL}(p_e(\mathbf{z})||q(\mathbf{z})),$$

so that the ELBO can be written as:

$$\begin{aligned} \text{ELBO} &= \mathbb{E}[\log(d(\mathbf{x}|\mathbf{z}, y))] \\ &\quad - (\alpha + \lambda - 1)\text{KL}(p_e(\mathbf{z})||q(\mathbf{z})) \\ &\quad - (1 - \alpha)\mathbb{E}[\text{KL}(p_e(\mathbf{z}, y|\mathbf{x})||q(\mathbf{z}, y))]. \end{aligned}$$

As in MMDVAE (see Eq. 1), we can replace  $\text{KL}(p_e(\mathbf{z})||q(\mathbf{z}))$  with a general strict divergence function. We considered the  $\text{MMD}(\cdot)$  term, obtaining the a general formulation for all the five AEs:

$$\begin{aligned} \text{ELBO} &= \mathbb{E}[\log(d(\mathbf{x}|\mathbf{z}, y))] & (2) \\ &\quad - (\alpha + \lambda - 1)\text{MMD}(p_e(\mathbf{z})||q(\mathbf{z})) \\ &\quad - (1 - \alpha)\mathbb{E}[\text{KL}(p_e(\mathbf{z}, y|\mathbf{x})||q(\mathbf{z}, y))]. \end{aligned}$$

We modified the  $\text{MMD}(p_e(\mathbf{z})||q(\mathbf{z}))$  such that it is not necessary to sample from the Gaussian mixture distribution  $e(\mathbf{z}|\mathbf{x})$  or from the posterior  $q(\mathbf{z})$ . Our modification allows for sampling from the single Gaussian distributions that form the mixtures. We used the the reparametrization trick proposed in [5] so that  $\text{MMD}(p_e(\mathbf{z})||q(\mathbf{z}))$  can be approximated. Specifically,  $\mathbb{E}_{p_e(\mathbf{z}), p(\mathbf{z}')}[\mathcal{K}(\mathbf{z}, \mathbf{z}')] can be approximated as:$

$$\frac{1}{N^2} \sum_{i=1}^N \sum_{j=1}^N \sum_{y=1}^K \sum_{y'=1}^K p_e(y, x_i) p_e(y', x'_j) \mathbb{E}_{p_e(\mathbf{z}|x_i, y), p_e(\mathbf{z}'|x'_j, y')}[\mathcal{K}(\mathbf{z}, \mathbf{z}')],$$

where  $N$  is the number of provided samples (i.e., cells). The approximation of  $\mathbb{E}_{q(\mathbf{z}), q(\mathbf{z}')}[\mathcal{K}(\mathbf{z}, \mathbf{z}')] is:$

$$\sum_{y=1}^K \sum_{y'=1}^K q(y)q(y') \mathbb{E}_{q(\mathbf{z}|y), q(\mathbf{z}'|y')}[\mathcal{K}(\mathbf{z}, \mathbf{z}')].$$

Finally,  $\mathbb{E}_{p_e(\mathbf{z}), q(\mathbf{z}')}[\mathcal{K}(\mathbf{z}, \mathbf{z}')] is approximated as:$

$$\sum_{i=1}^N \sum_{y=1}^K \sum_{y'=1}^K p_e(y|x_i) q(y') \mathbb{E}_{p_e(\mathbf{z}|y, x_i), q(\mathbf{z}'|y')}[\mathcal{K}(\mathbf{z}, \mathbf{z}')].$$

To calculate the ELBO function described in Eq. 2,  $\mathbb{E}[\text{KL}(p_e(\mathbf{z}, y|\mathbf{x})||q(\mathbf{z}, y))]$  must be computable. We can rewrite it as follows:

$$\begin{aligned} \mathbb{E}[\text{KL}(p_e(\mathbf{z}, y|\mathbf{x})||q(\mathbf{z}, y))] &= \mathbb{E} \left[ \log \frac{p_e(\mathbf{z}|y, \mathbf{x}) p_e(y|\mathbf{x})}{q(\mathbf{z}|y) q(y)} \right] \\ &= \mathbb{E} \left[ \log \frac{p_e(\mathbf{z}|y, \mathbf{x})}{q(\mathbf{z}|y)} \right] + \mathbb{E} \left[ \mathbb{E} \left[ \log \frac{p_e(y|\mathbf{x})}{q(y)} \right] \right] \\ &= \mathbb{E}[\text{KL}(p_e(y|\mathbf{x})||q(y))] + \mathbb{E}[\mathbb{E}[\text{KL}(p_e(\mathbf{z}|\mathbf{x}, y)||q(\mathbf{z}|y))]]. \end{aligned}$$

Considering the weights of  $q(\mathbf{z})$  fixed to a uniform distribution,  $\mathbb{E}[\text{KL}(p_e(y|\mathbf{x})||q(y))]$  can be written as:

$$\mathbb{E}[\text{KL}(p_e(y|\mathbf{x})||q(y))] = \mathbb{E} \left[ \sum_{y=1}^K p_e(y|\mathbf{x}) \log(p_e(y|\mathbf{x})) \right] + \log(K).$$

On the contrary, when the weights are learnable,  $\mathbb{E}[\text{KL}(p_e(y|\mathbf{x})||q(y))]$  can be analytically calculated as:

$$\mathbb{E}[\text{KL}(p_e(y|\mathbf{x})||q(y))] = \mathbb{E} \left[ \sum_{y=1}^K p_e(y|\mathbf{x}) \log(p_e(y|\mathbf{x})) - \sum_{y=1}^K p_e(y|\mathbf{x}) \log(q(y)) \right].$$

Finally,  $\text{KL}(p_e(\mathbf{z}|\mathbf{x}, y)||q(\mathbf{z}|y))$  can be calculated by the following approximation:

$$\text{KL}(p_e(\mathbf{z}|\mathbf{x}, y)||q(\mathbf{z}|y)) = \mathbb{E} \left[ \log \frac{p_e(\mathbf{z}|\mathbf{x}, y)}{q(\mathbf{z}|y)} \right] \approx \log \frac{p_e(\mathbf{z}|\mathbf{x}, y)}{q(\mathbf{z}|y)}$$

## Additional Files

### Additional file 2 — Excel file of the metrics calculated for the PBMC datasets

Each tab is related to a tested approach and shows the calculated metrics and used method.

### Additional file 3 — Excel file of the metrics calculated for the PIC datasets

Each tab is related to a tested approach and shows the calculated metrics and used method.

### Additional file 4 — Excel file of the metrics calculated for the MCA datasets

Each tab is related to a tested approach and shows the calculated metrics and used method.

## References

- [1] Zhao, S., Song, J., Ermon, S.: Infovae: Balancing learning and inference in variational autoencoders. In: Proceedings of the AAAI Conference on Artificial Intelligence, vol. 33, pp. 5885–5892 (2019)
- [2] Kullback, S., Leibler, R.A.: On information and sufficiency. *Ann Math Statist.* **22**(1), 79–86 (1951). doi:10.1214/aoms/1177729694
- [3] Gretton, A., Borgwardt, K., Rasch, M., Schölkopf, B., Smola, A.J.: A kernel method for the two-sample-problem. In: Proceedings of the Conference on Advances in Neural Information Processing Systems, pp. 513–520 (2007)

- [4] Grønbech, C.H., Vording, M.F., Timshel, P.N., Sønderby, C.K., Pers, T.H., Winther, O.: scVAE: Variational auto-encoders for single-cell gene expression data. *Bioinformatics* (2020). doi:10.1093/bioinformatics/btaa293
- [5] Kingma, D.P., Welling, M.: Auto-encoding variational bayes. arXiv preprint arXiv:1312.6114 (2013)
